# Supplementary material
Source: MDPI journal article supplement (https://www.mdpi.com/2073-4344/11/12/1535)
Supplement: s1 [file s1]

## TiCl<sub>4</sub>/MgCl<sub>2</sub>/MCM-41 Bi-supported Ziegler–Natta Catalyst: Effects of Catalyst Composition on Ethylene/1-Hexene Copolymerization

Xiaoyu Liu <sup>1</sup>, Wenqi Guo <sup>1</sup>, Xue-er Wang <sup>1</sup>, Yintian Guo <sup>2,3</sup>, Biao Zhang <sup>4</sup>, Zhisheng Fu <sup>1</sup>, Qi Wang and Zhiqiang Fan <sup>1,\*</sup>

1 MOE Key Laboratory of Macromolecular Synthesis and Functionalization, Department of Polymer Science and Engineering, Zhejiang University, Hangzhou, 310027, China; xiaoyu\_liu@zju.edu.cn (X.-Y.L.); guowq@zju.edu.cn (W.-Q.G.); wang\_xe@zju.edu.cn (X.-E.W.); fuzs@zju.edu.cn (Z.-S.F.); wangq@zju.edu.cn (Q. W.).

2 Zhejiang Hetian Chemical Co., Ltd., Hangzhou, 310023, China; guoyintian@sinochem.com (Y.-T.G.)

3 Sinochem Lantian Zhejiang Research Institute of Chemical Industry Co., Ltd., Hangzhou, 310023, China

4 Zhejiang Sinopont Technology Co., LTD. Xiaoshan, Hangzhou, 311254, China; zhangbiao@sinopont.com (B.Z.)

\*To whom correspondence should be addressed: Zhiqiang Fan (E-mail: fanzq@zju.edu.cn)

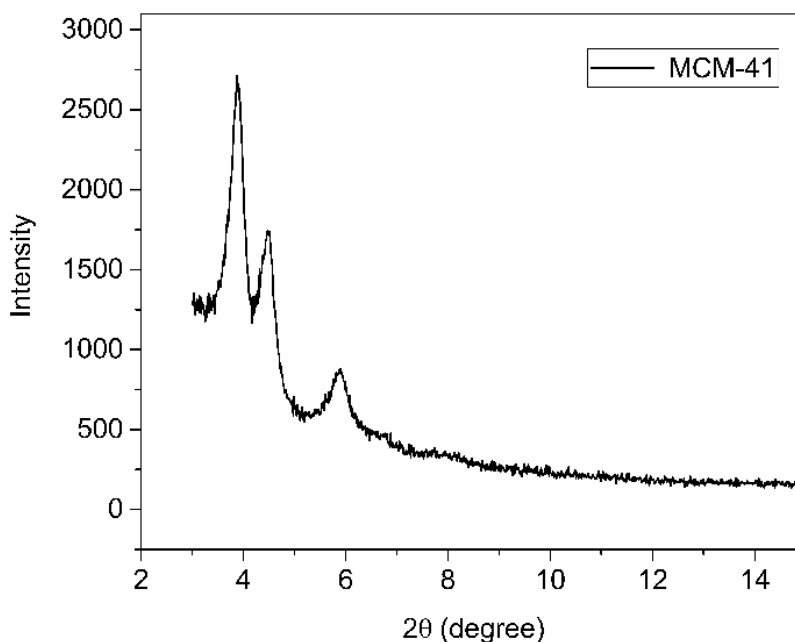

Figure S1. XRD curve of MCM-41.

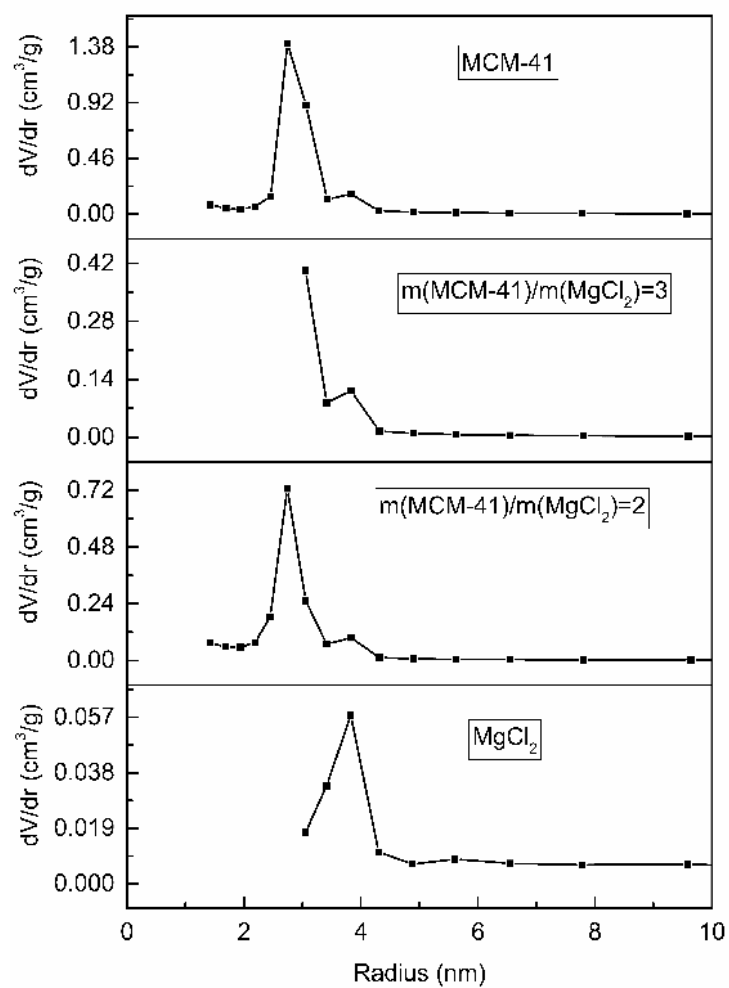

Figure S2. Pore size distribution of MgCl<sub>2</sub>, MCM-41 and two composite supports.

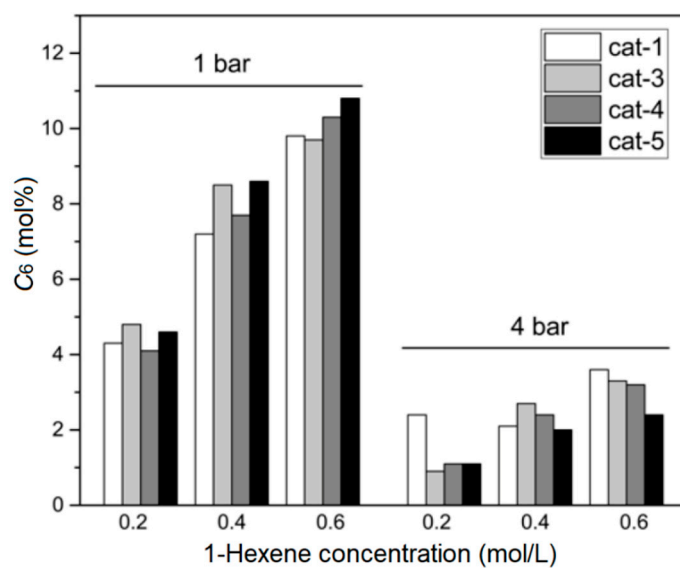

Figure S3. 1-Hexene content of ethylene/1-hexene copolymer produced under 1 bar and 4 bar.

Table S1. Boiling *n*-heptane extraction results of copolymer catalyzed by cat-1, cat-3, cat-4 and cat-5 under 1 bar.

| Entry | Catalyst | [H]<br>(mol/L) | C <sub>6</sub> <sup>a</sup><br>(mol%) | Conv. <sup>b</sup><br>(%) | C7-s              |                                       | C7-in             |                                       |
|-------|----------|----------------|---------------------------------------|---------------------------|-------------------|---------------------------------------|-------------------|---------------------------------------|
|       |          |                |                                       |                           | Fraction<br>(wt%) | C <sub>6</sub> <sup>a</sup><br>(mol%) | Fraction<br>(wt%) | C <sub>6</sub> <sup>a</sup><br>(mol%) |
| 2     | cat-1    | 0.2            | 4.3                                   | 36.2                      | 43.5              | 8.3                                   | 56.5              | 1.6                                   |
| 3     | cat-1    | 0.4            | 7.2                                   | 33.9                      | 61.4              | 10.6                                  | 38.6              | 2.5                                   |
| 4     | cat-1    | 0.6            | 9.8                                   | 31.6                      | 68.2              | 13.6                                  | 31.8              | 3.1                                   |
| 10    | cat-3    | 0.2            | 4.8                                   | 47.4                      | 42.7              | 8.9                                   | 57.3              | 2.0                                   |
| 11    | cat-3    | 0.4            | 8.5                                   | 40.4                      | 63.6              | 12.9                                  | 36.4              | 2.5                                   |
| 12    | cat-3    | 0.6            | 9.7                                   | 39.4                      | 67.9              | 15.1                                  | 32.1              | 3.0                                   |
| 14    | cat-4    | 0.2            | 4.1                                   | 28.7                      | 40.7              | 8.6                                   | 59.3              | 1.6                                   |
| 15    | cat-4    | 0.4            | 7.7                                   | 28.5                      | 62.6              | 12.0                                  | 37.4              | 3.0                                   |
| 16    | cat-4    | 0.6            | 10.3                                  | 30.2                      | 69.1              | 15.2                                  | 30.9              | 3.1                                   |
| 18    | cat-5    | 0.2            | 4.6                                   | 29.1                      | 38.3              | 9.8                                   | 61.7              | 1.6                                   |
| 19    | cat-5    | 0.4            | 8.6                                   | 28.4                      | 56.5              | 12.9                                  | 43.5              | 2.1                                   |
| 20    | cat-5    | 0.6            | 10.8                                  | 24.2                      | 64.6              | 14.1                                  | 35.4              | 2.3                                   |

<sup>a</sup> C<sub>6</sub> indicates 1-hexene content in copolymer determined by FTIR. <sup>b</sup> Conversion rate of 1-hexene.

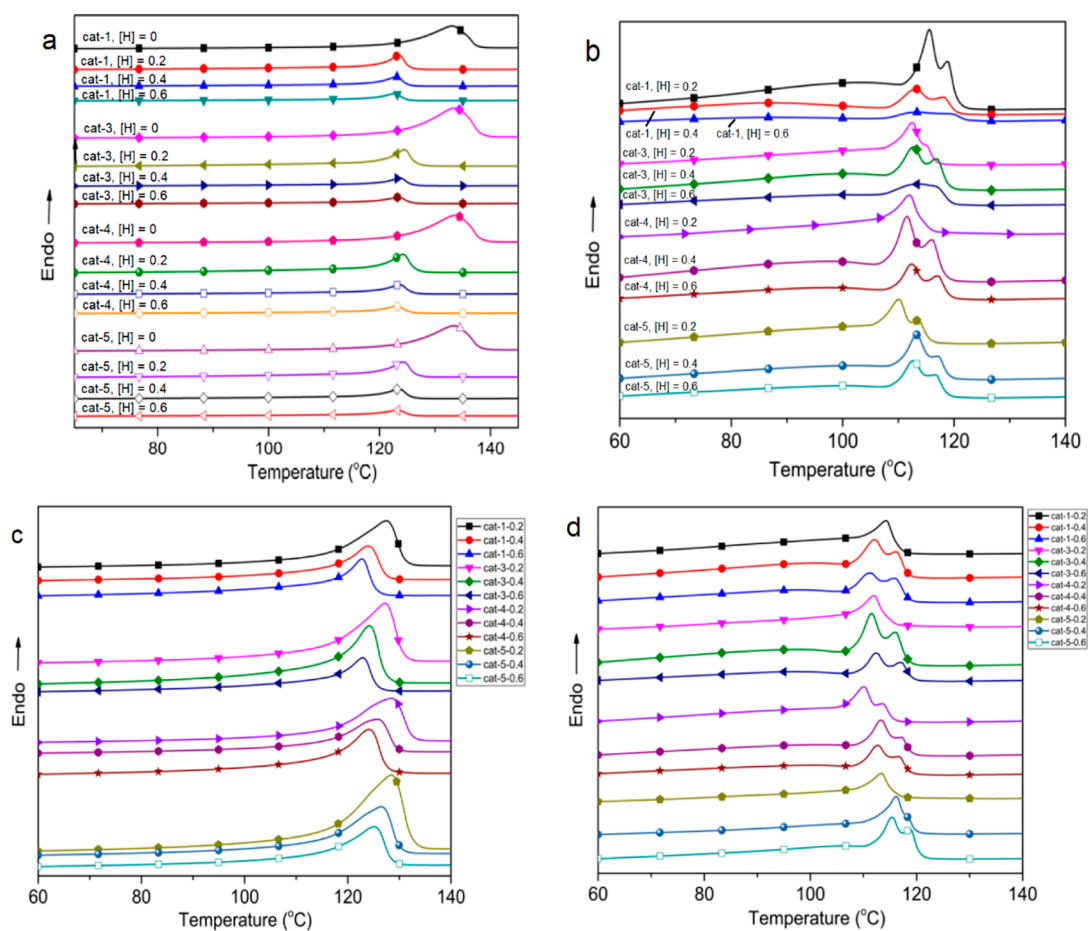

Figure S4. DSC traces of unfractionated (co)polymers produced under (a) 1 bar and (c) 4 bar, and their C7-s fractions produced under (b) 1 bar and (d) 4 bar.

Table S2. Thermal properties of copolymer and C7-sol fraction produced by cat-1, cat-3, cat-4 and cat-5 under 1 bar.

| Entry | Catalyst | [H] (mol/L) | C7-s       |                    | C7-in      |                    |
|-------|----------|-------------|------------|--------------------|------------|--------------------|
|       |          |             | $T_m$ (°C) | $\Delta H_m$ (J/g) | $T_m$ (°C) | $\Delta H_m$ (J/g) |
| 2     | cat-1    | 0.2         | 114        | 49.4               | 125        | 118.2              |
| 3     | cat-1    | 0.4         | 112        | 28.7               | 125        | 103.5              |
| 4     | cat-1    | 0.6         | 111        | 12.6               | 125        | 98.5               |
| 10    | cat-3    | 0.2         | 114        | 47.9               | 125        | 115.8              |
| 11    | cat-3    | 0.4         | 111        | 17.6               | 124        | 105.9              |
| 12    | cat-3    | 0.6         | 114        | 7.1                | 124        | 98.0               |
| 14    | cat-4    | 0.2         | 115        | 8.6                | 125        | 115.3              |
| 15    | cat-4    | 0.4         | 113        | 12.0               | 125        | 105.1              |
| 16    | cat-4    | 0.6         | 111        | 15.2               | 124        | 99.8               |
| 18    | cat-5    | 0.2         | 115        | 9.8                | 125        | 120.9              |
| 19    | cat-5    | 0.4         | 114        | 12.9               | 125        | 108.4              |
| 20    | cat-5    | 0.6         | 113        | 14.1               | 125        | 100.8              |

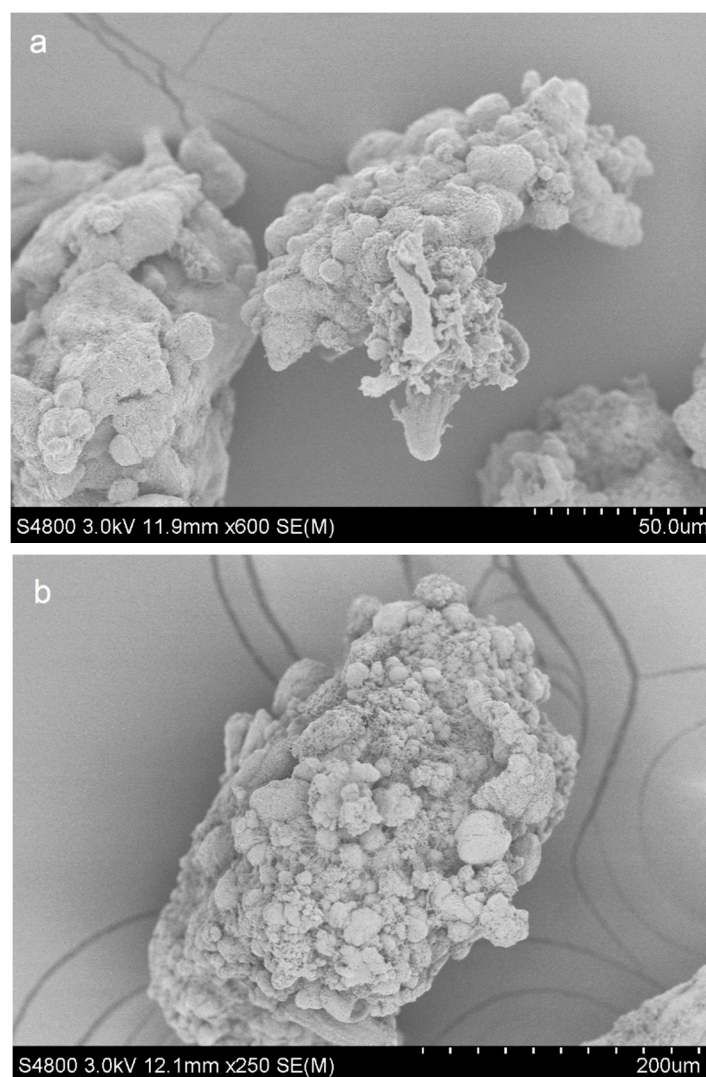

Figure S5. Morphology of nascent copolymer particles synthesized under 4 bar ethylene pressure and [H] = 0.2 mol/L with cat-4 and cat-5.

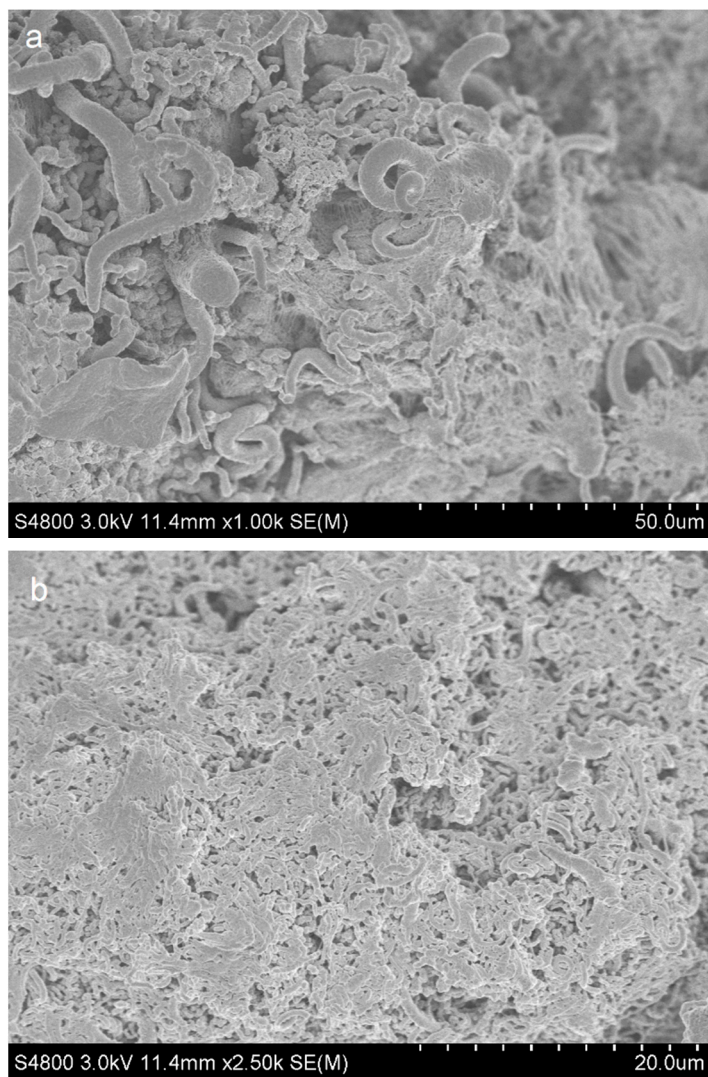

Figure S6. Morphology of nascent copolymer particles synthesized under 4 bar ethylene pressure and  $[H] = 0.2 \text{ mol/L}$  with cat-1.
